# Supplementary figures and images for: Transcript Specificity in Yeast Pre-mRNA Splicing Revealed by Mutations in Core Spliceosomal Components
Source: PLOS journal article supplement (doi:10.1371/journal.pbio.0050090), 2007-03-22

**Figure S10**

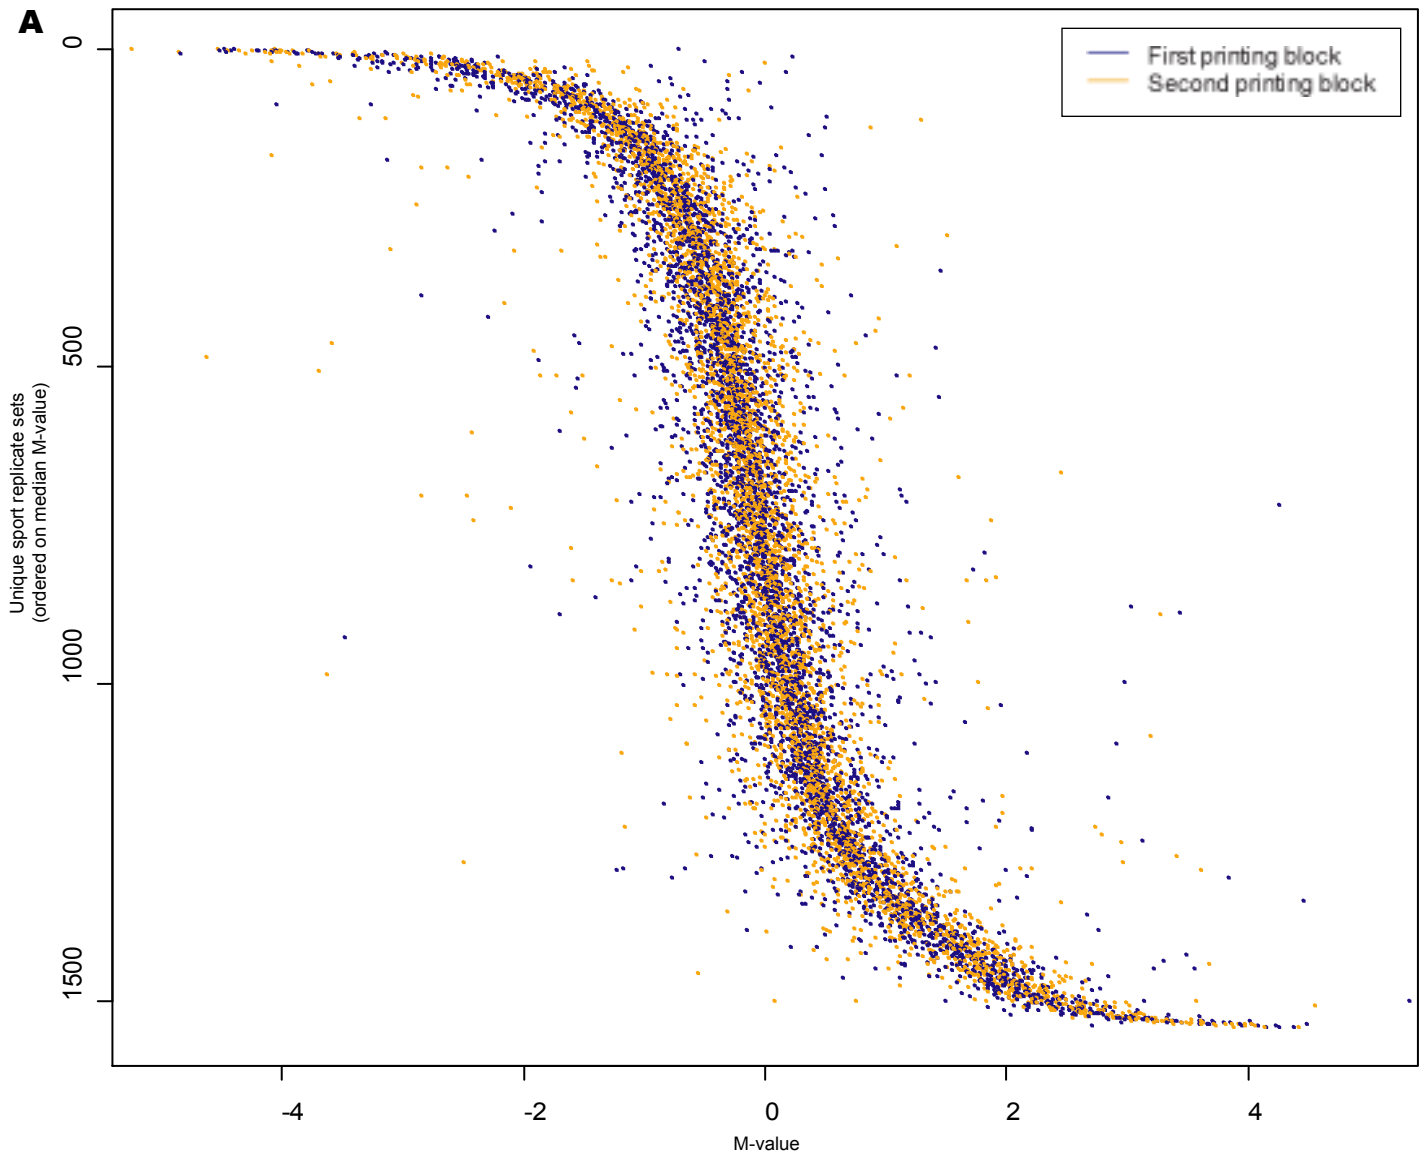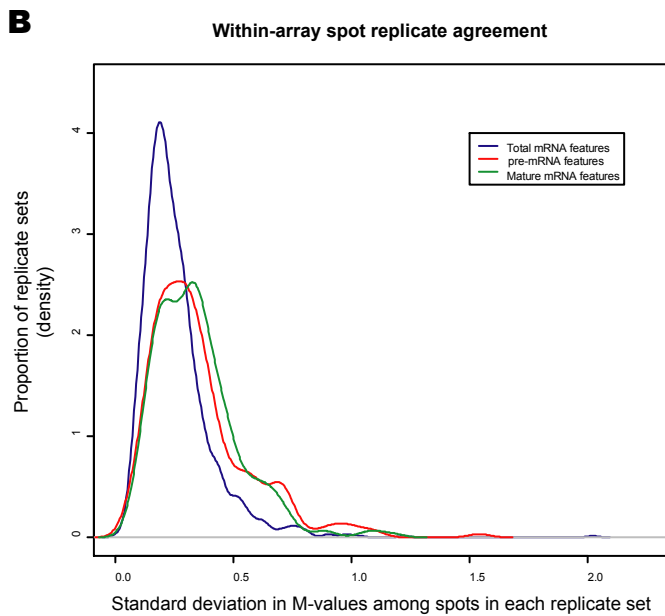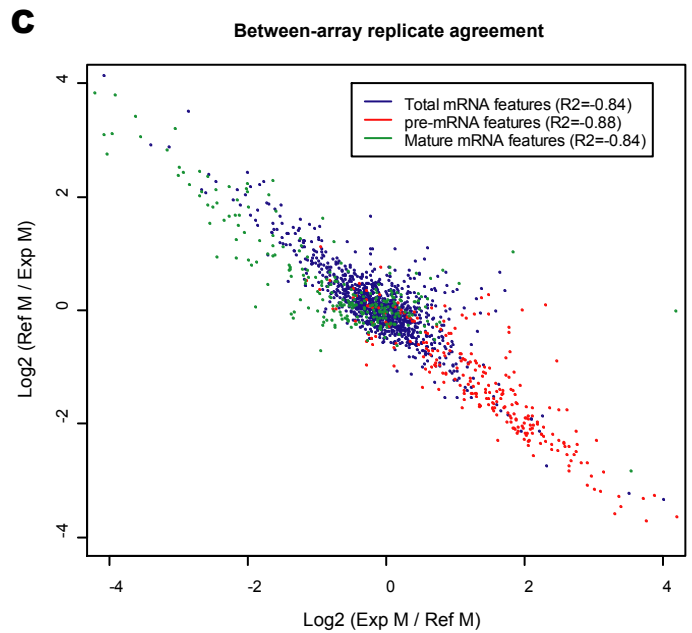

Supplement: S10 (10.1371/journal.pbio.0050090.s010) [file journal.pbio.0050090.s010]
